# Supplementary material for: Microsaccade Dynamics Enhance Nodule Detection and Discriminate Reader Expertise Levels During Chest Radiography
Source: Research Square preprint supplement (doi:10.21203/rs.3.rs-9694768/v1), 2026-06-29
Supplement: Supplementary file 1 [file 15e6d6ac5eaf78dab9e928cf.docx]

## Supplemental Figures


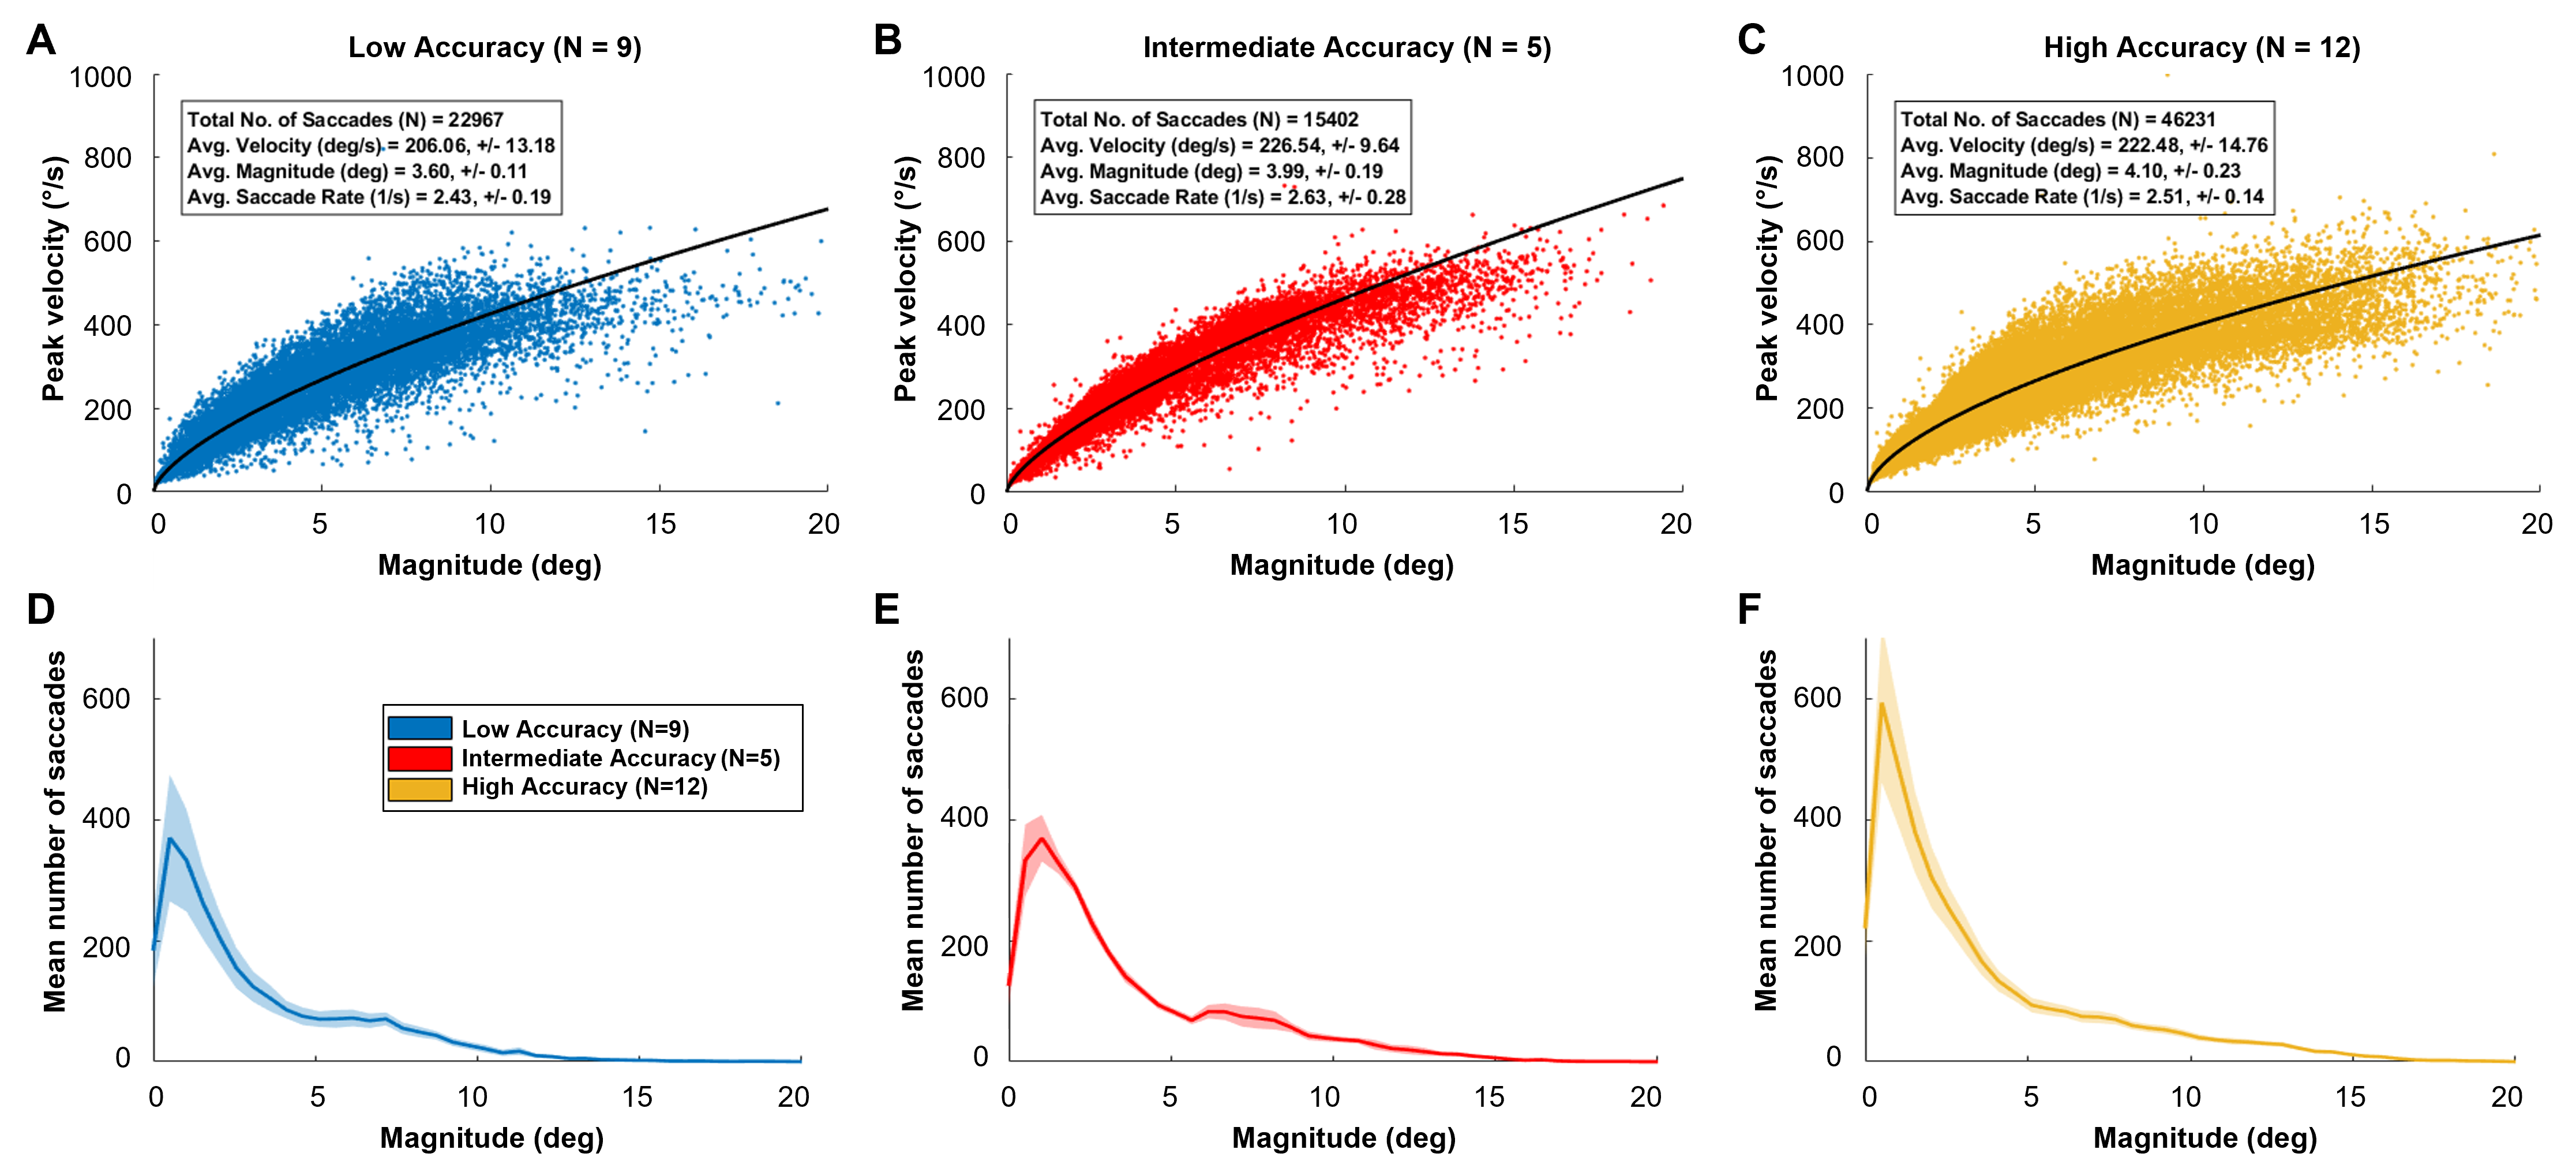


**Supplemental Figure 1: (Micro)saccade characterization. (A,B,C)** Peak velocity-magnitude relationship for all (micro)saccades. **(D,E,F)** Distribution of (micro)saccade magnitudes.

**
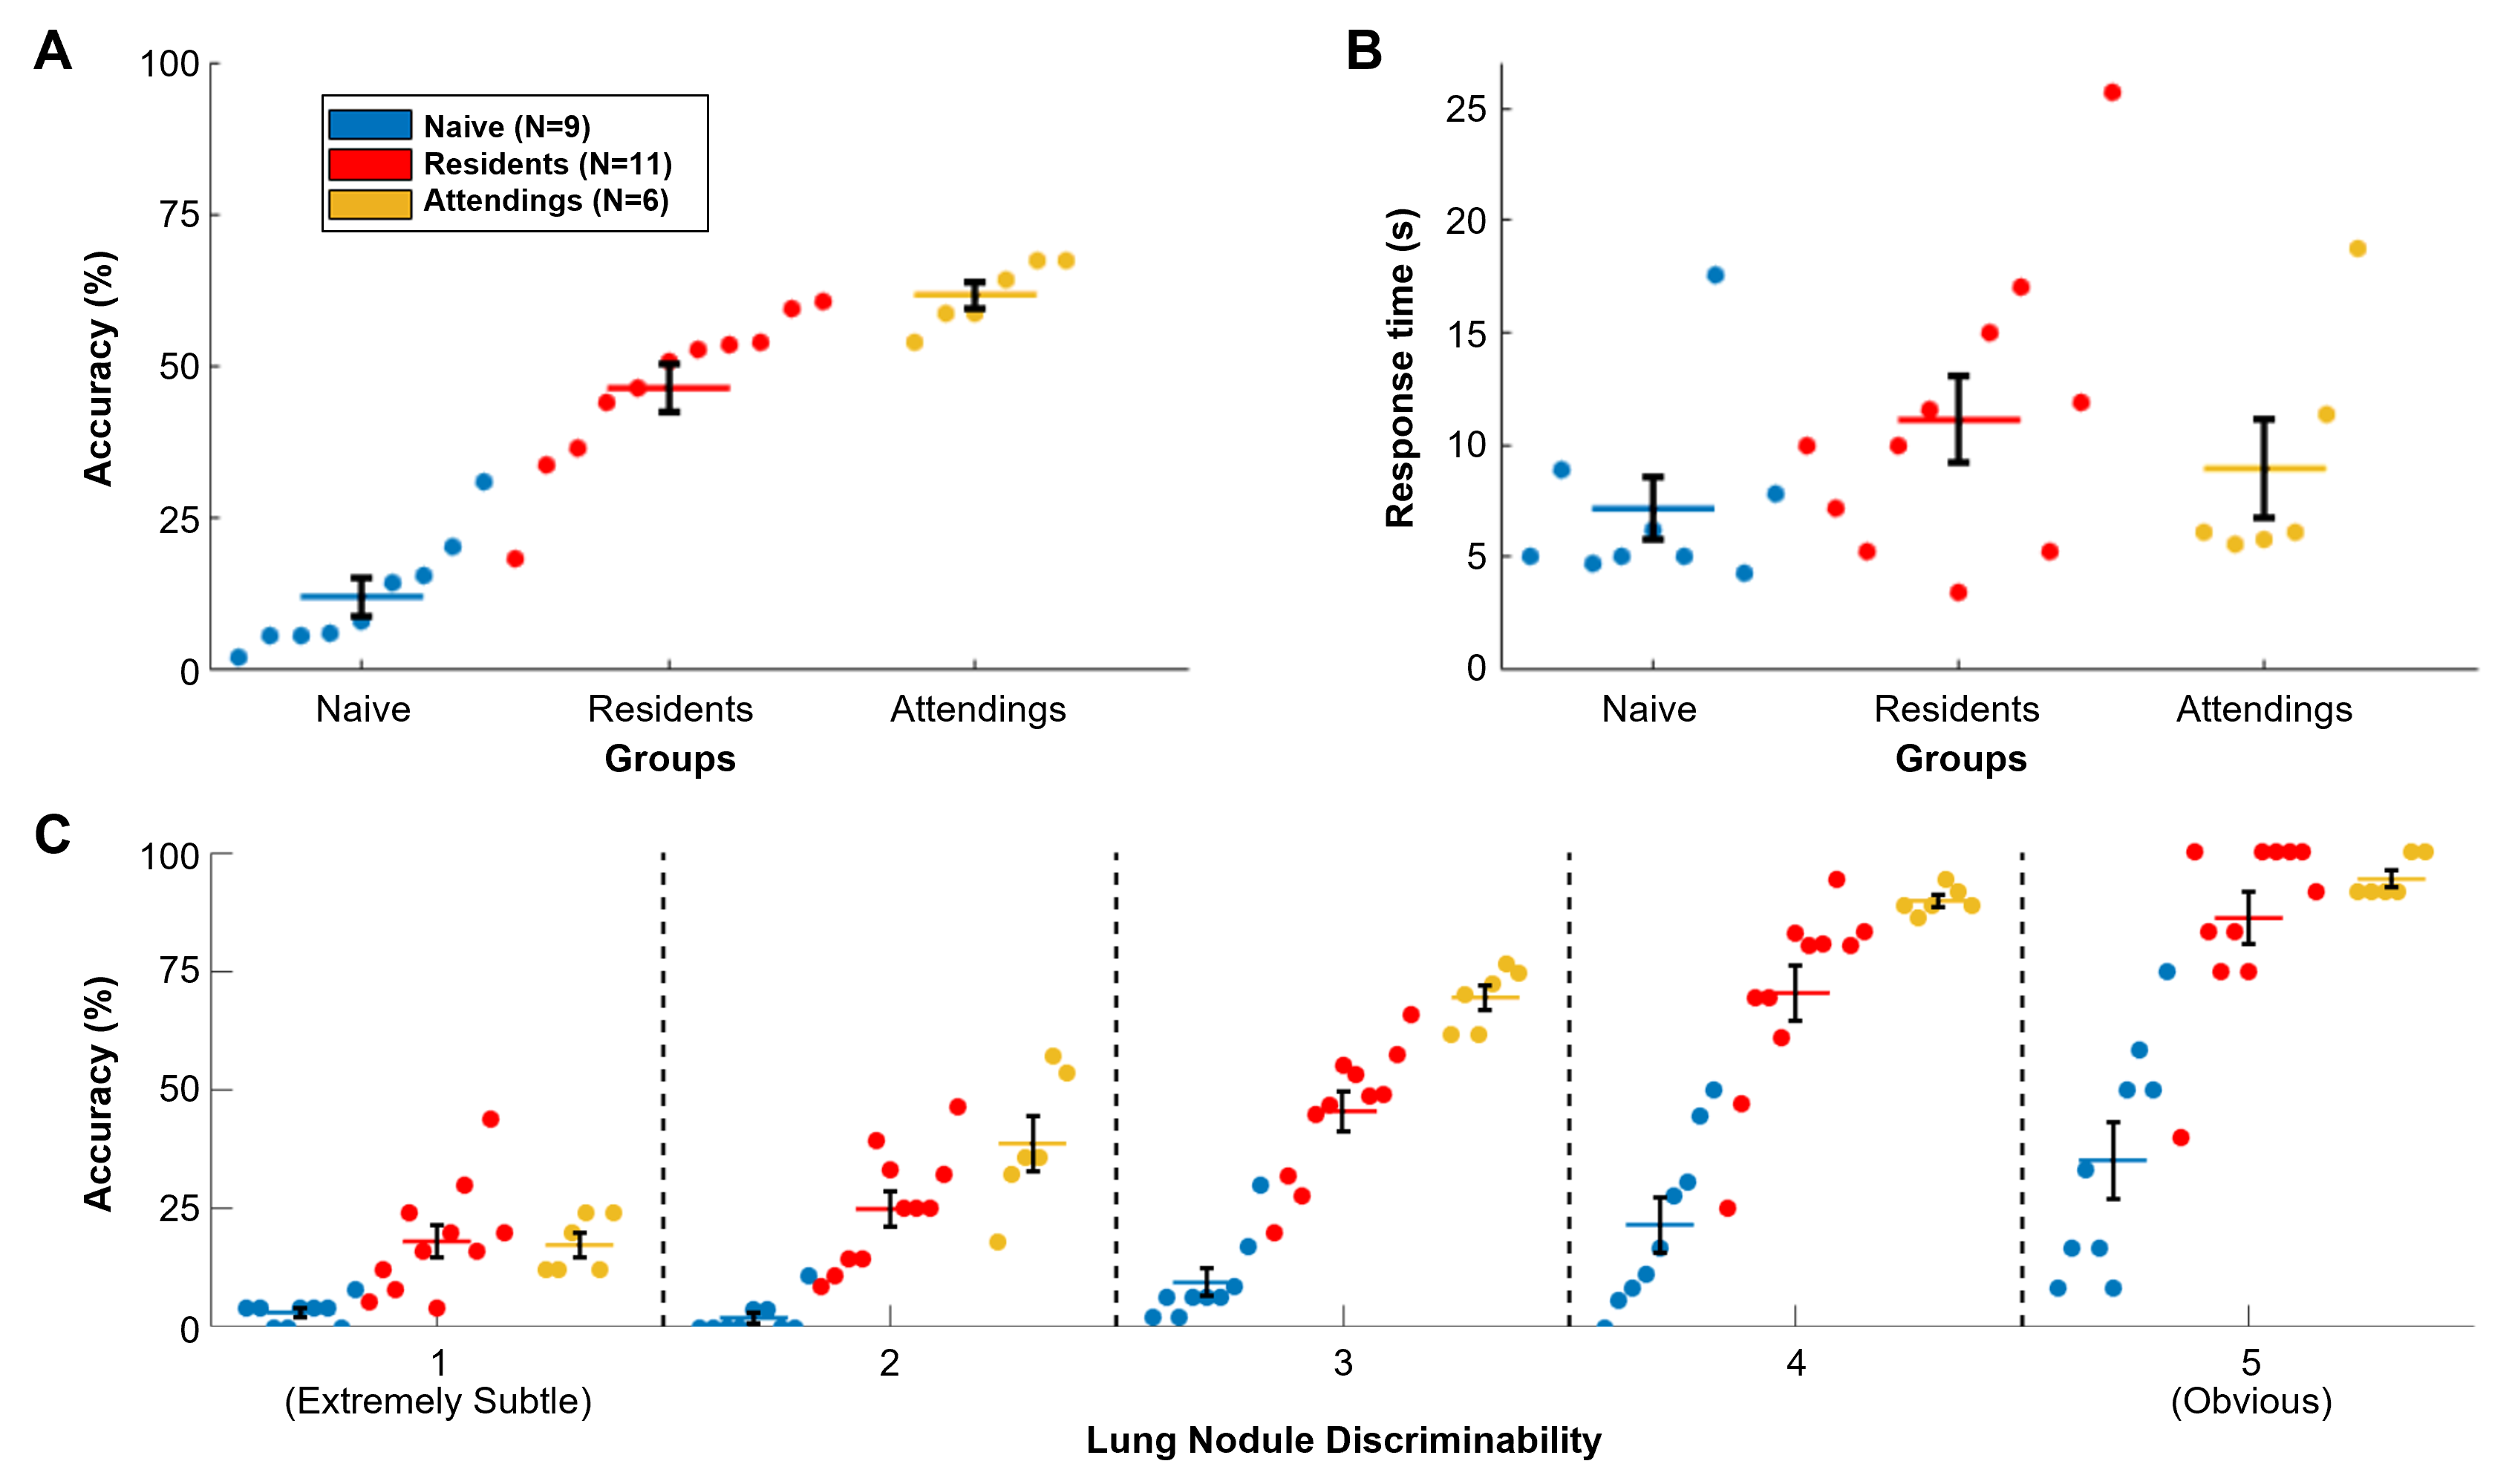
**

**Supplemental Figure 2: Performance data for individual participants grouped by career level.** Accuracy **(A)** and response time **(B)** for individual participants. The accuracy for individual participants is also shown **(C)** as a function of lung nodule discriminability. Error bars indicate SEM. Horizontal bars indicate the group average. The individual data points in **A-C** are sorted from left to right in order of increasing accuracy within each participant group (Naive, Residents, or Attendings).

**
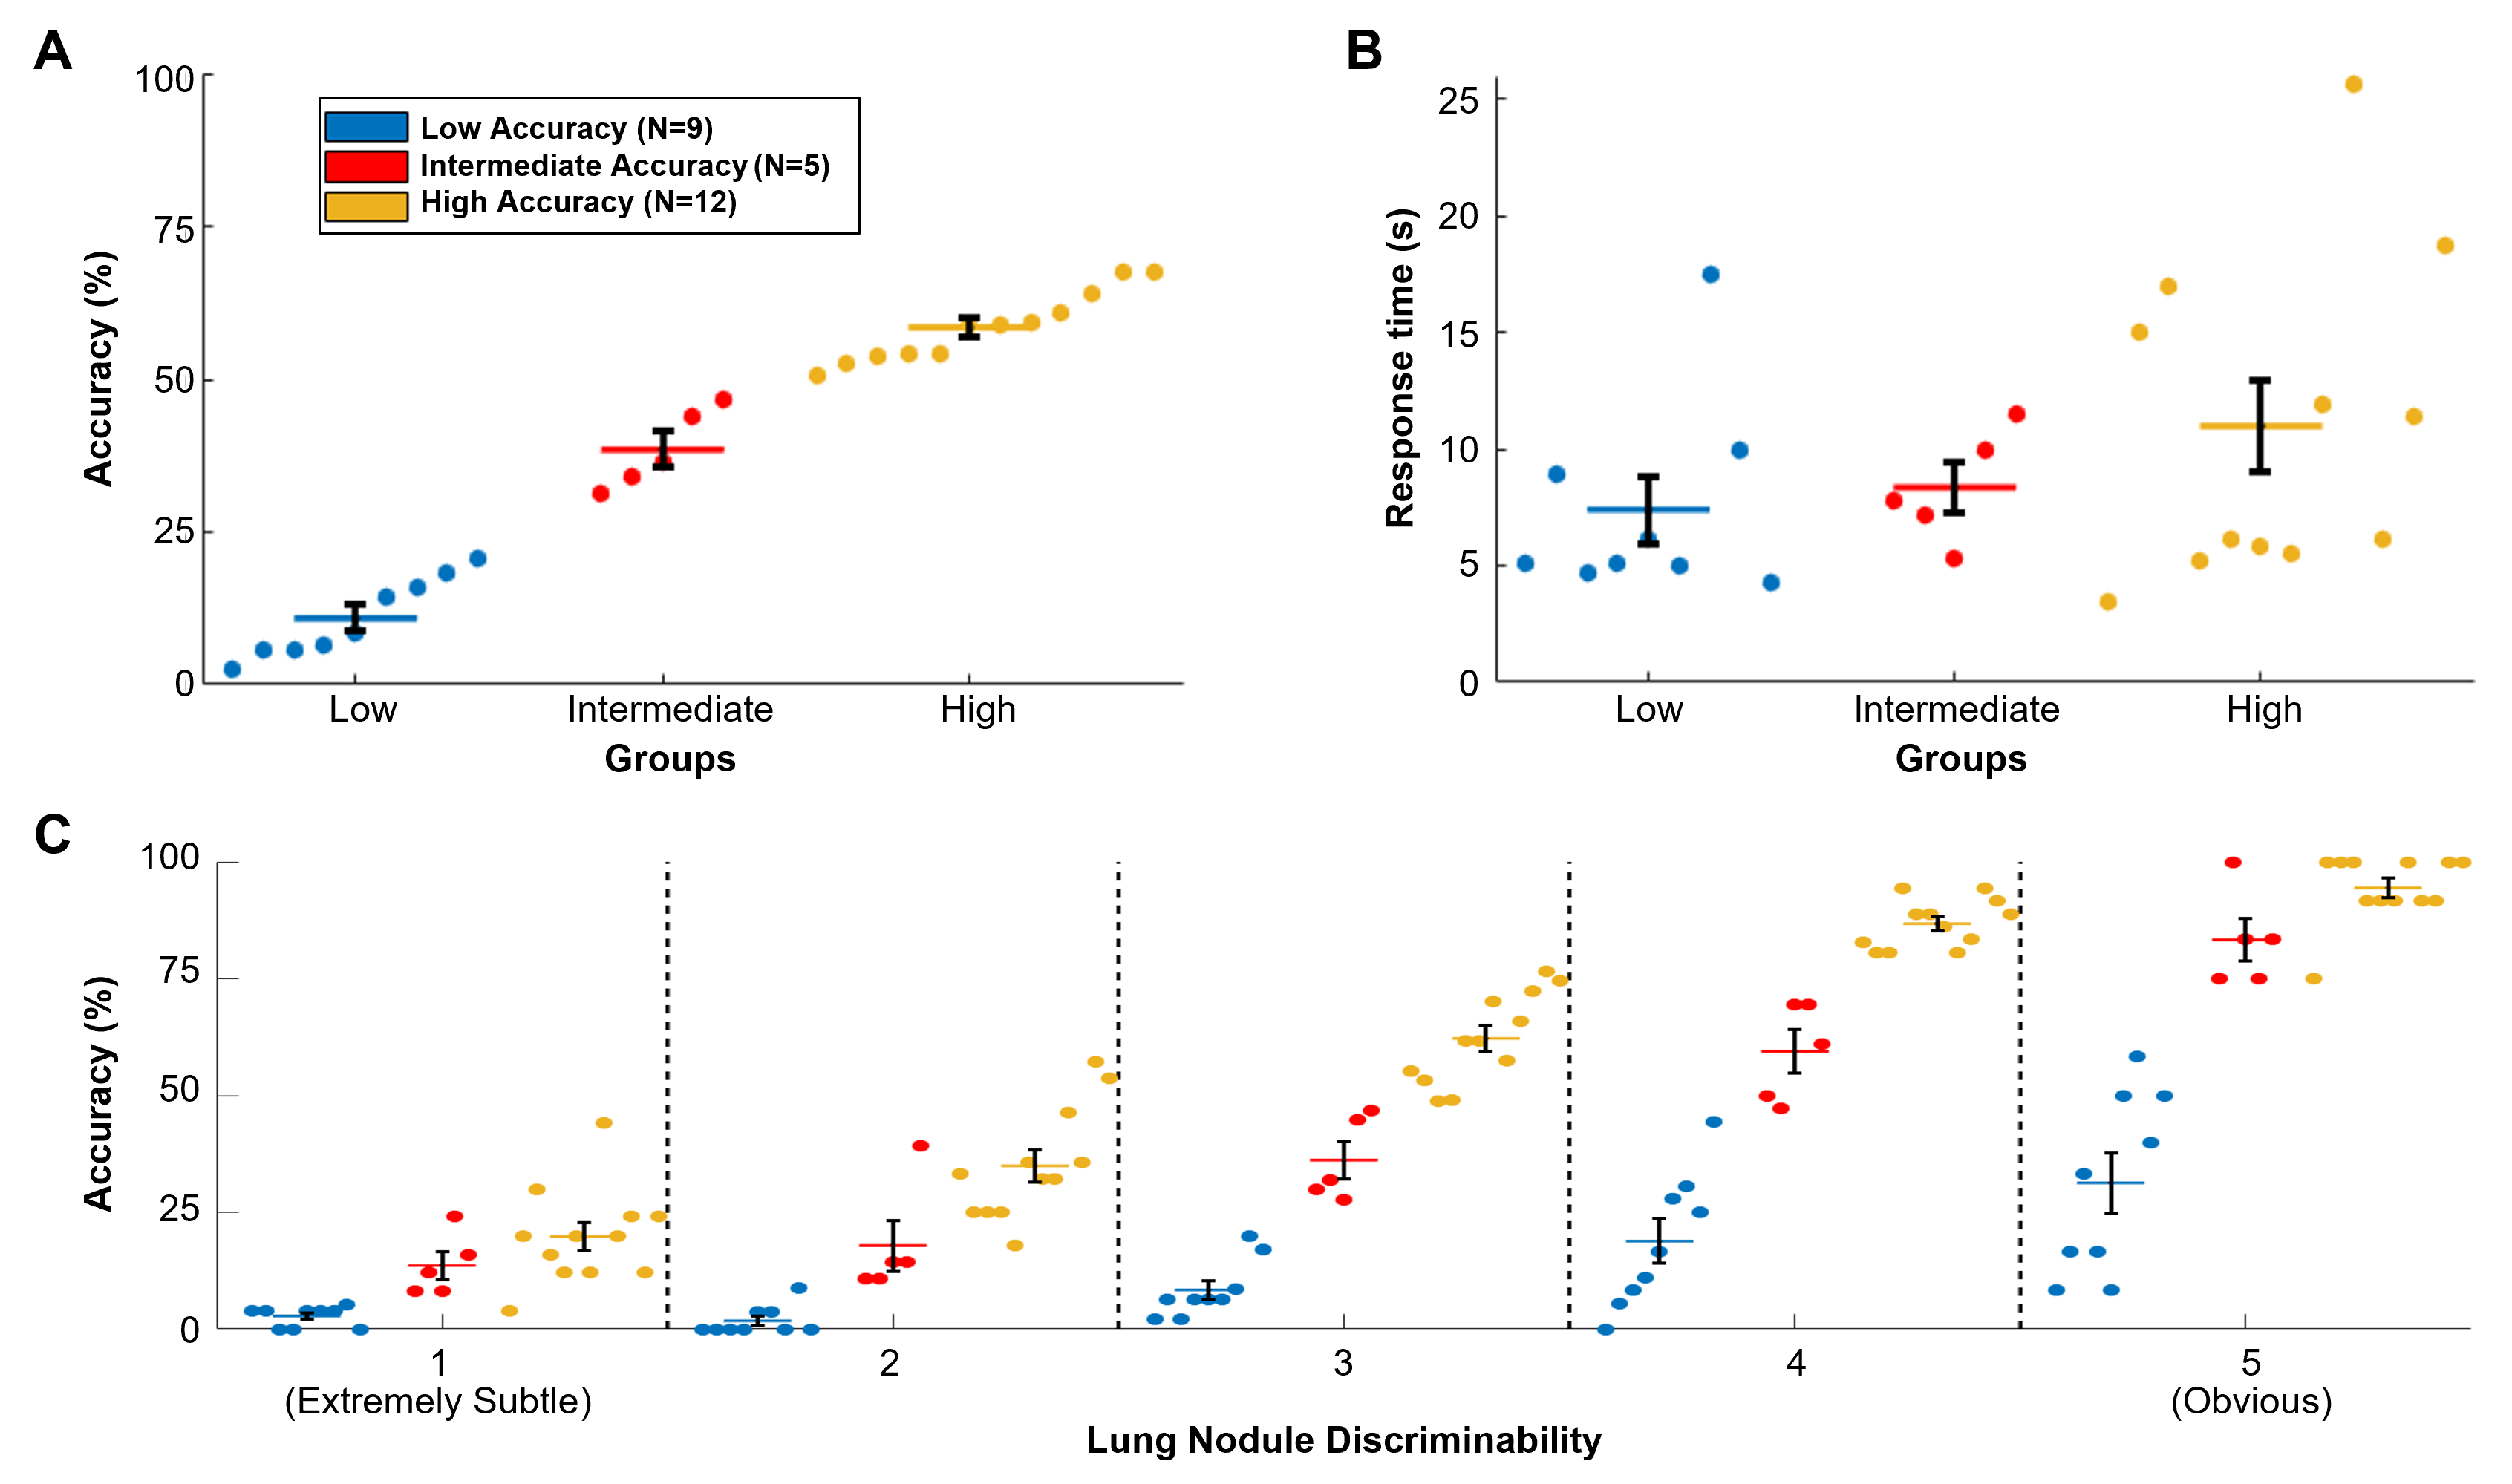
**

**Supplemental Figure 3: Performance data for individual participants grouped by performance accuracy.** Accuracy **(A)** and response time **(B)** for individual participants. The inter-group differences in **A** are inherent to the grouping itself; thus, this purpose of this panel is descriptive rather than explanatory. The accuracy for individual participants is also shown **(C)** as a function of lung nodule discriminability. Error bars indicate SEM. Horizontal bars indicate the group average (also plotted in **Figure 1**). The individual data points in **A-C** are sorted from left to right in order of increasing accuracy within each participant group.

**
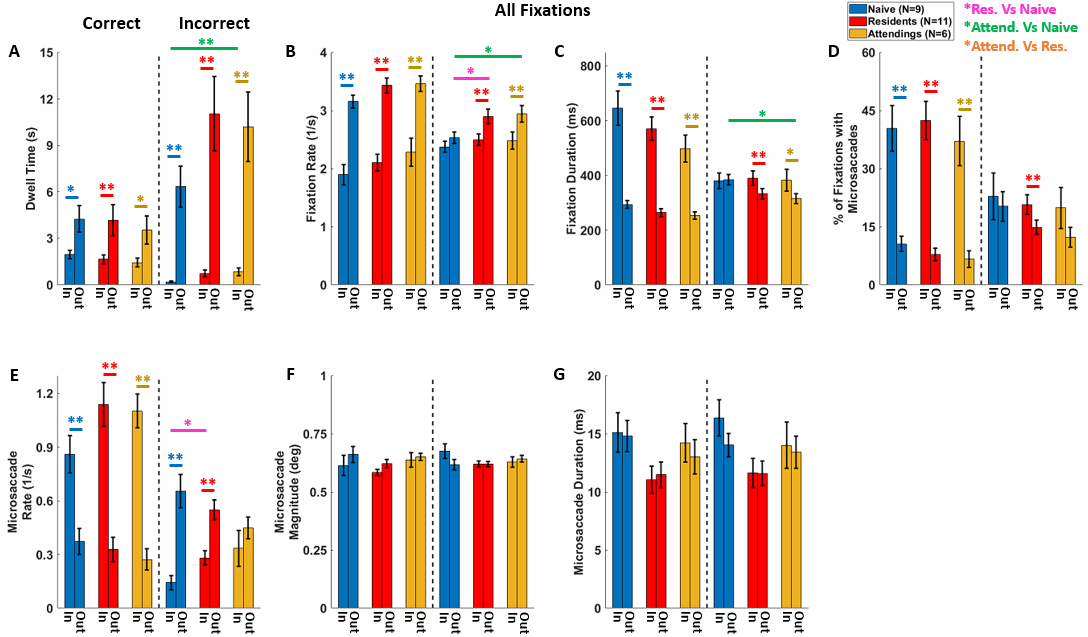
**

**Supplemental Figure 4: Same data as in Figure 3, with participants grouped by career level rather than performance accuracy.** Comparable results were obtained for either type of participant grouping, including the finding that a higher percentage of fixations contain microsaccades inside than outside the target window on correct trials **(D)**. Microsaccade rates are likewise higher inside than outside the target window on correct trials **(E)**. * indicates p < .05; ** indicates p < .01.


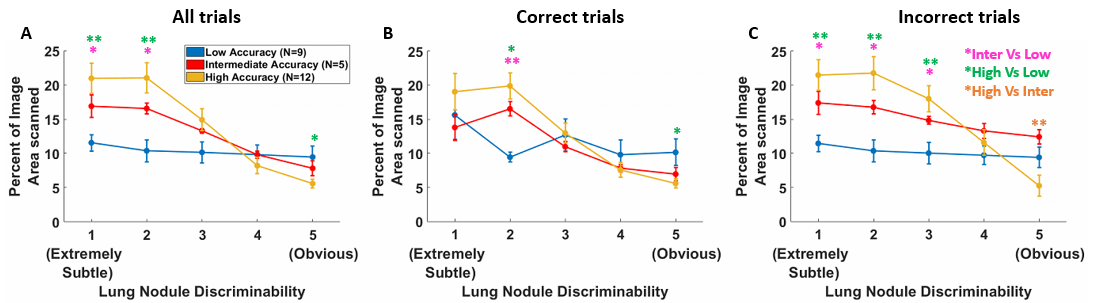


**Supplemental Figure 5: Percent of image area foveated, without normalization.** The same patterns are observed here as in **Figure 2**. * indicates p < .05; ** indicates p < .01.

**
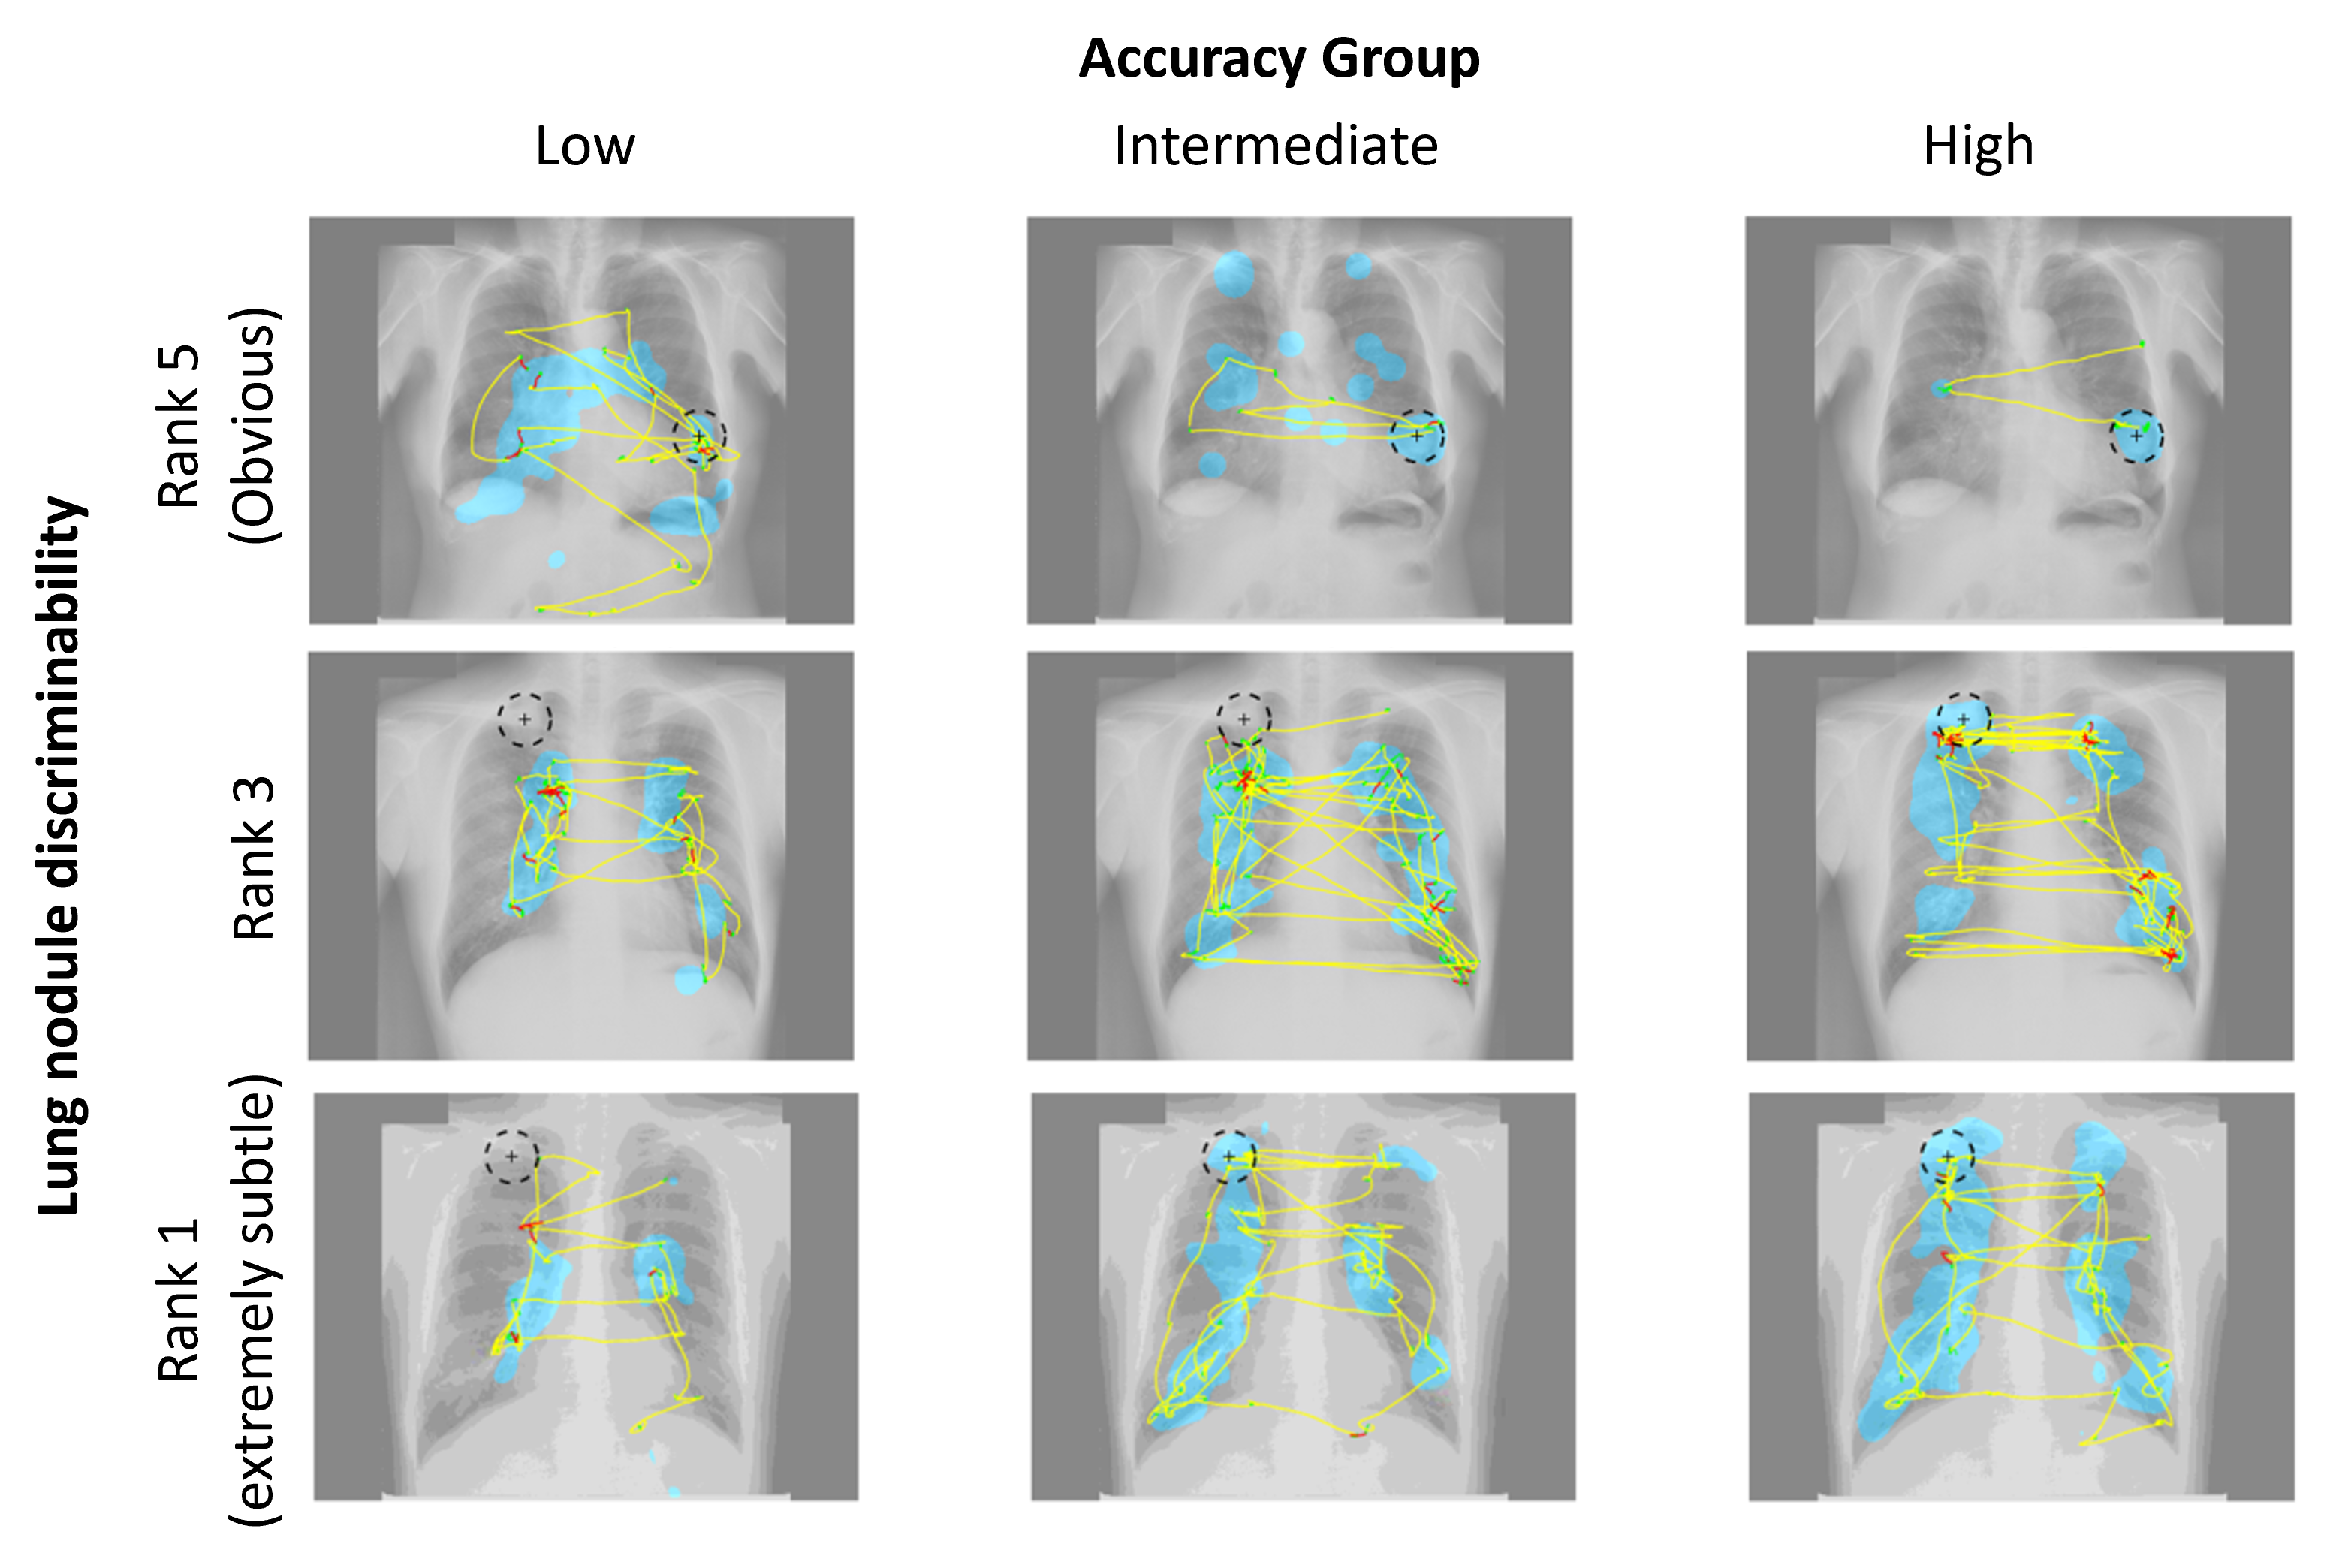
**

**Supplemental Figure 6: Representative maps of consistently and inconsistently fixated regions**, excluding one participant from each image rank condition (the participant whose scanpaths are shown, in yellow). Consistently-fixated regions across participants are shown in cyan.

**
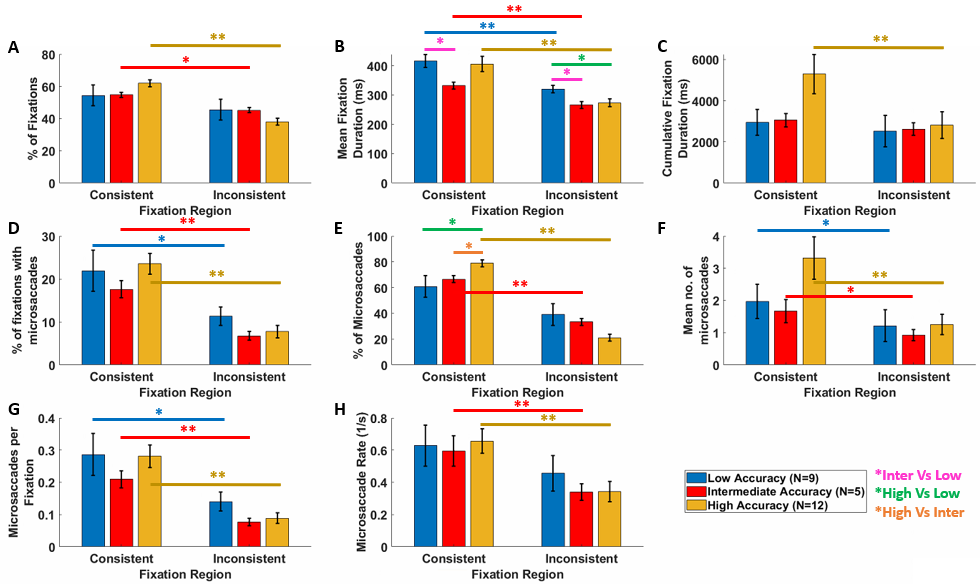
**

**Supplemental Figure 7: Characterization of gaze behavior for consistently vs. inconsistently fixated image regions. A)** Overall, more fixations fell in consistently fixated image regions, except for fixations produced by low accuracy participants. This is presumably due to low accuracy participants viewing idiosyncratic image locations more frequently than participants in the other groups (see **Supplemental Figure 6**). Other patterns typically resemble those resulting from comparing gaze behavior inside vs. outside the target window (**Figure 2**), presumably because the consistently fixated areas often overlapped with the target window. Fixation durations were longer in consistently than in inconsistently fixated regions **(B)**, a higher percentage of fixations contained microsaccades in consistently than in inconsistently fixated regions **(D)**, and microsaccades were generated primarily within the consistently fixated regions **(E).** * indicates p < .05; ** indicates p < .01.

**
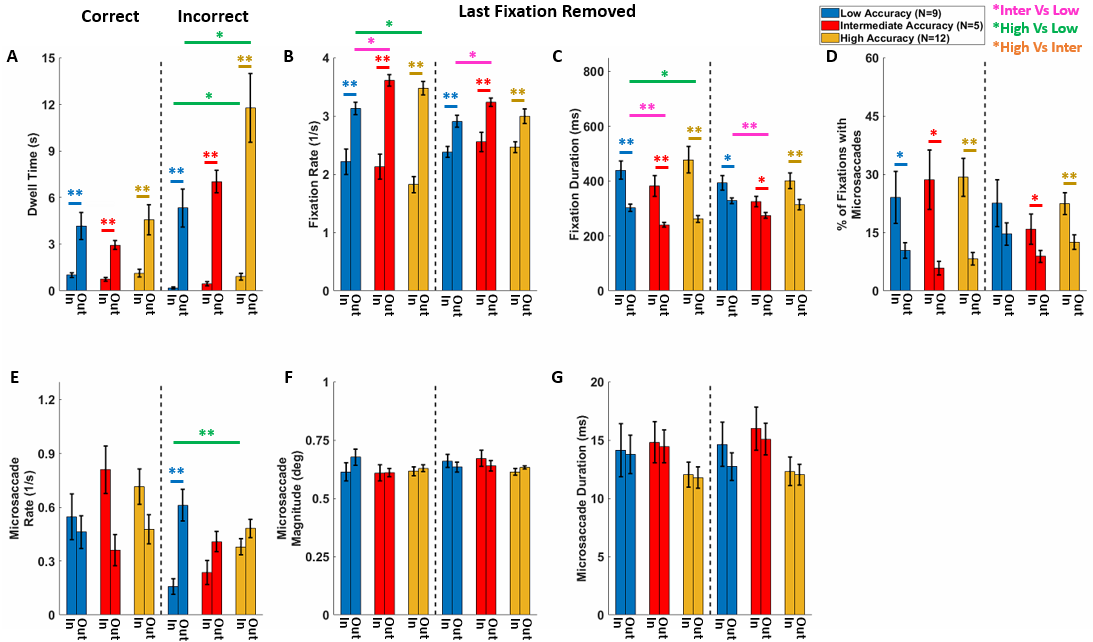
**

**Supplemental Figure 8: Analyses with the last fixation excluded from each trial.** To rule out the possibility that the elevated microsaccade rate near the targets was driven by the task requirement to foveate the target when pressing the button, we conducted the same analyses but removed the last fixation from each trial. The same patterns are generally observed, and more fixations contain microsaccades inside than outside the target window **(D).** * indicates p < .05; ** indicates p < .01.

|  |  | Low Accuracy (N=9) | Intermediate Accuracy (N=5) | High Accuracy (N=12) |
| --- | --- | --- | --- | --- |
| Microsaccades (≤1°) | Total number of microsaccades | 474±145 per participant  (3±1 per trial) | 386±75 per participant  (3±1 per trial) | 677±142 per participant  (5±1 per trial) |
| Microsaccade rate (*N*/s) | 0.45±0.09 | 0.32±0.05 | 0.40±0.06 |
| Microsaccade magnitude (°) | 0.62±0.02 | 0.62±0.02 | 0.62±0.01 |
| Microsaccade duration (ms) | 13±1 | 15±1 | 12±1 |
| Microsaccadic peak velocity (°/s) | 69.13±6.52 | 61.86±1.22 | 71.24±2.65 |
| Saccades (>1°) | Total number of saccades | 2077±435 | 2695±131 | 3175±458 |
| Saccade rate (*N*/s) | 4.25±0.1 | 4.46±0.18 | 4.73±0.21 |
| Saccade magnitude (°) | 1.98±0.15 | 2.31±0.27 | 2.1±0.12 |
| Saccade duration (ms) | 34±2 | 38±3 | 34±2 |
| Saccadic peak velocity (°/s) | 233.89±9.66 | 249.21±7.86 | 248.25±13.79 |
| (Micro)saccades (all magnitudes) | Total number of (micro)saccades | 2553±563 | 3080±182 | 3853±589 |
| (Micro)saccade rate (*N*/s) | 2.43±0.19 | 2.63±0.27 | 2.51±0.14 |
| (Micro)saccade magnitude (°) | 3.6±0.11 | 3.99±0.18 | 4.09±0.23 |
| (Micro)saccade duration (ms) | 30±2 | 35±3 | 31±2 |
| (Micro)saccadic peak velocity (°/s) | 206.05±13.18 | 226.54±9.64 | 222.47±14.76 |

**Supplemental Table 1. Descriptive statistics of microsaccades and saccades.**

|  | Means ± SEs Inside the window | | | Means ± SEs Outside the window | | |
| --- | --- | --- | --- | --- | --- | --- |
|  | Low | Inter | High | Low | Inter | High |
| Dwell time (s) | 1.92 ± 0.27 | 1.26 ± 0.14 | 1.72 ± 0.28 | 4.13 ± 0.87 | 2.85 ± 0.28 | 4.49 ± 0.96 |
| Mean number of fixations per trial | 3.18 ± 0.35 | 2.57 ± 0.2 | 2.96 ± 0.31 | 11.77 ± 2.39 | 9.47 ± 0.79 | 12.81 ± 2.23 |
| Fixation rate (1/s) | 1.96 ± 0.18 | 2.22 ± 0.15 | 2.05 ± 0.15 | 3.02 ± 0.15 | 3.48 ± 0.13 | 3.33 ± 0.1 |
| Fixation duration (ms) | 633 ± 65 | 502 ± 38 | 573 ± 44 | 302 ± 13 | 240 ± 8 | 262 ± 12 |
| Time spent in fixation (% of trial) | 33.42 ± 3.66 | 31.36 ± 1.46 | 35.37 ± 2.05 | 44.99 ± 4.36 | 40.83 ± 2.84 | 40.45 ± 1.98 |
| % of fixations with microsaccades | 29.17 ± 4.26 | 41.61 ± 4.85 | 51.54 ± 4.91 | 5.16 ± 1.44 | 12.55 ± 1.33 | 26.13 ± 3.03 |
| Mean no. of microsaccades per trial | 1.22 ± 0.28 | 1.11 ± 0.15 | 1.46 ± 0.25 | 1.39 ± 0.46 | 0.67 ± 0.15 | 1.79 ± 0.46 |
| Microsaccade rate (1/s) | 0.65 ± 0.12 | 0.91 ± 0.08 | 0.85 ± 0.09 | 0.31 ± 0.06 | 0.2 ± 0.06 | 0.27 ± 0.05 |
| Microsaccade duration (ms) | 14 ± 2 | 15 ± 2 | 12 ± 1 | 14 ± 2 | 14 ± 1 | 12 ± 1 |
| Microsaccade magnitude (deg) | 0.61 ± 0.04 | 0.59 ± 0.02 | 0.6 ± 0.02 | 0.67 ± 0.03 | 0.61 ± 0.02 | 0.63 ± 0.01 |
| Microsaccades per fixation (1/N) | 0.51 ± 0.11 | 0.52 ± 0.05 | 0.54 ± 0.06 | 0.12 ± 0.02 | 0.06 ± 0.02 | 0.09 ± 0.02 |

**Supplemental table 2. Gaze dynamics inside vs. outside the target window on correct trials.**
